# Supplementary material
Source: PubMed Central journal article supplement (PMC10064974)
Supplement: NIHMS1882892-supplement-supporting_document.pdf [file NIHMS1882892-supplement-supporting_document.pdf]

## Support Information

### Fibrin-enriched Cardiac Extracellular Matrix Hydrogel Promotes In Vitro Angiogenesis

Rubia Shaik<sup>1&</sup>, Jiazhu Xu<sup>2&</sup>, Yong Wang<sup>3</sup>, Yi Hong<sup>2\*</sup>, Ge Zhang<sup>1\*</sup>,

- 1 Department of Biomedical Engineering, The University of Akron, Ohio, OH 44325
- 2 Department of Bioengineering, University of Texas at Arlington, Arlington, TX 76019
- 3 Department of Biomedical Engineering, Pennsylvania State University, State College, PA, 16801

& These authors contributed equally

\* Corresponding authors:

Yi Hong, [yihong@uta.edu](mailto:yihong@uta.edu), Phone: 01-817-272-0562

Ge Zhang, [ge10@uakron.edu](mailto:ge10@uakron.edu), phone: 01-330-972-5237

**Figure S1.** Morphology and gelation kinetics of Fn hydrogel.

**Figure S2.** Comparison of network formation in Fn vs. Fn-cECM hydrogels.

**Figure S3.** The qualitative assessment of injectability of cECM and Fn-cECM hydrogels.

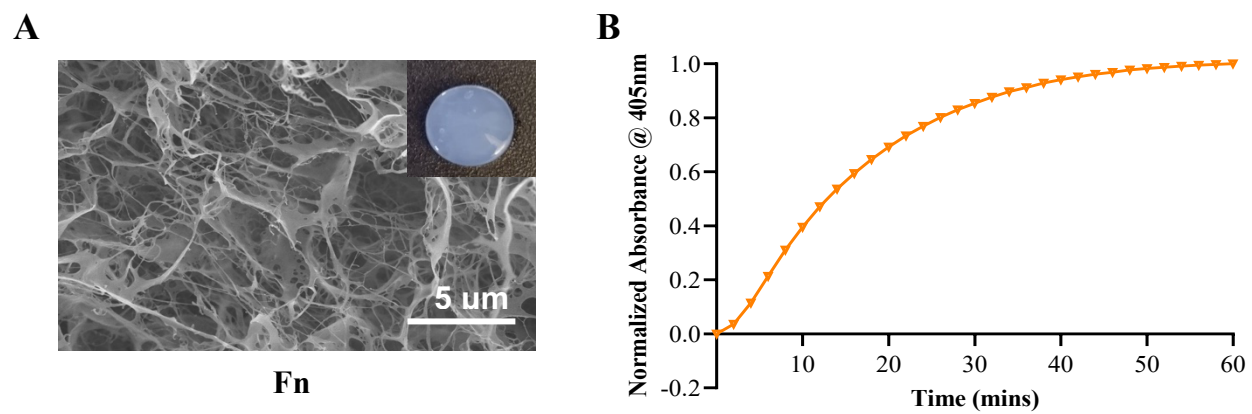

**Figure S1.** Morphology and gelation kinetics of Fn hydrogel. (A) Macroscopic view of Fn hydrogel with its SEM image. (B) Gelation kinetics of Fn hydrogel.

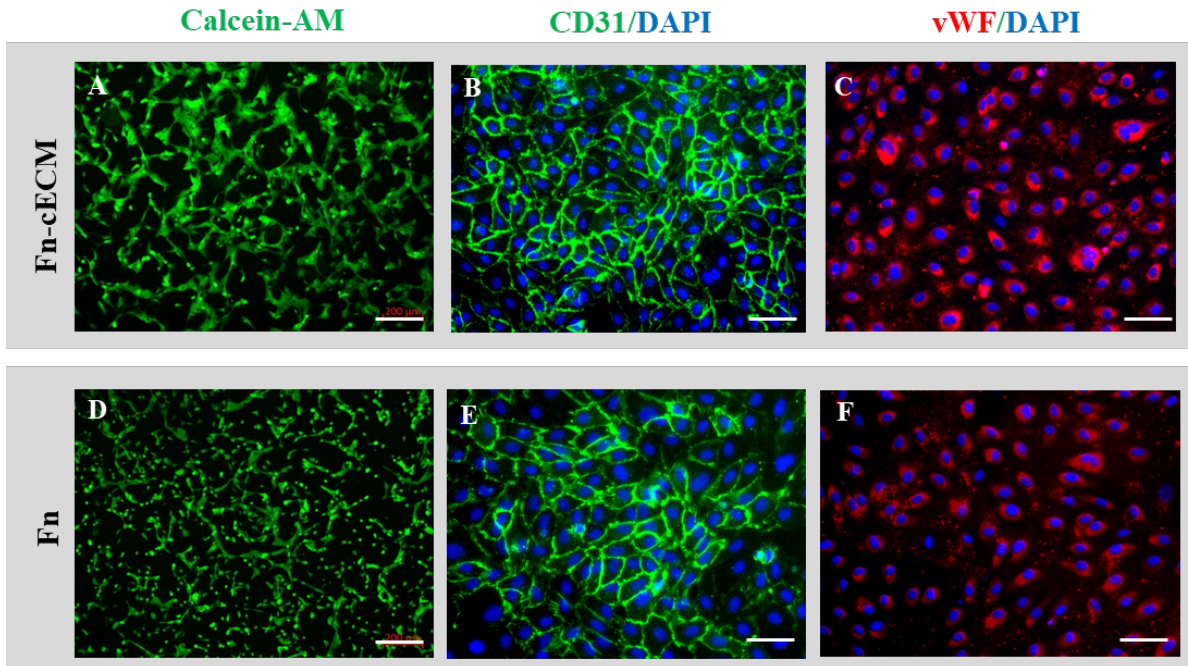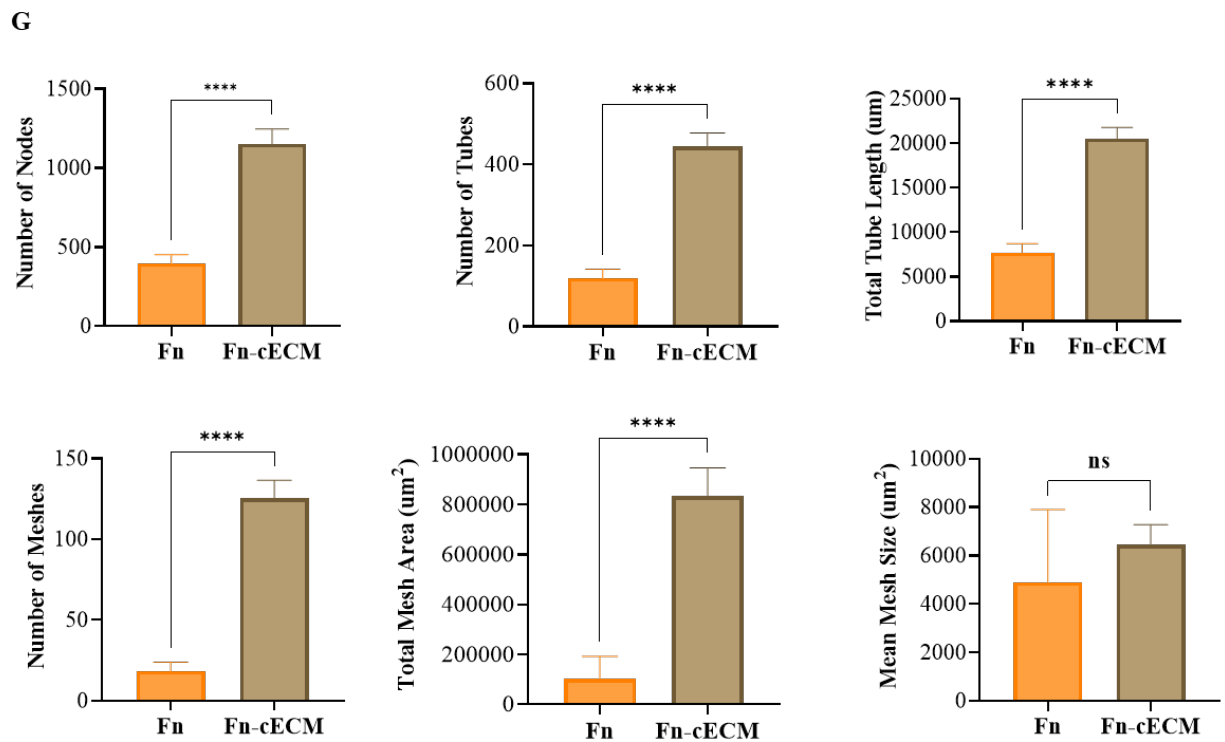

**Figure S2.** Comparison of HUVECs tube formation on Fn-cECM and Fibrin(Fn) hydrogels. (A,D) Vascular network formation and expression of (B,E) CD31 of HUVECs on Fn-cECM (A,B) and Fn (D, E) hydrogels. (C, F) Expression of vWF for HUVECs seeded on Fn-cECM (C) and Fn (F) hydrogels. Scale bar: 100μm.(G) Quantification of angiogenesis parameters using ImageJ software. n=7. \*p < 0.05, \*\*\*\*p < 0.0001

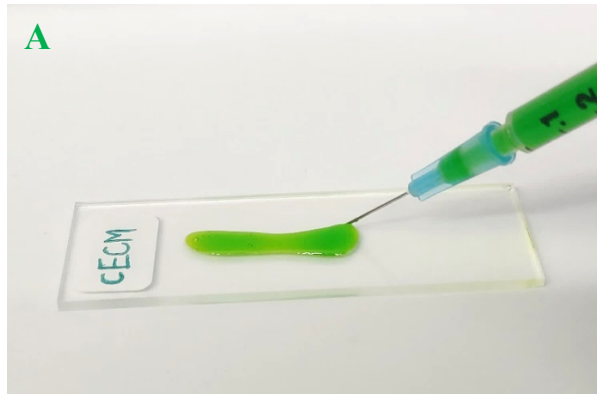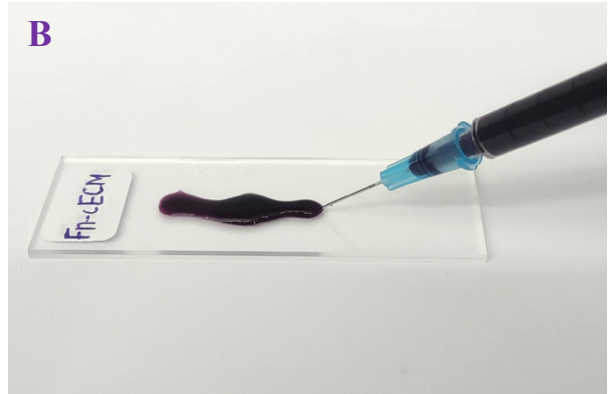

**Figure S3:** The qualitative assessment of injectability of cECM and Fn-cECM hydrogels. Injectability demonstrated as the ability to be pushed through a syringe. (A) cECM hydrogel colored in green (B) Fn-cECM hydrogel colored in purple pushed through BD syringe needles (1mL, 25G).
